# Supplementary material
Source: ML conference proceedings conference paper supplement (https://openreview.net/forum?id=M6l3pyvUfr)
Supplement: supplementary_material [file TRIDENT_Appendix.pdf › TRIDENT_Appendix.pdf]

## 765 A Data Collection and Processing

766 We obtain a dataset containing 320,000 molecule-text pairs from the PubChem database and prepro-  
767 cess the text descriptions following the MolecularSTM method. Specifically, molecule names are  
768 replaced with "this molecule is..." or "these molecules are..." to prevent the model from recognizing  
769 molecules based solely on their names. Additionally, to create unique SMILES-text pairs, we merge  
770 molecules with the same CID (chemical identifier) and filter out text descriptions with fewer than 18  
771 characters.

772 Moreover, we use PubChem's classification system to obtain up to 32 classification descriptions  
773 for each molecule, as illustrated in Algorithm 1. Ultimately, we generate 47,269 <SMILES, Text,  
774 Hierarchical Taxonomic Annotation> triplets. As shown in Figure 4, to further optimize and summa-  
775 rize the classification annotations, we use GPT-4 to generate summarized descriptions, resulting in  
776 high-quality HTA text descriptions.

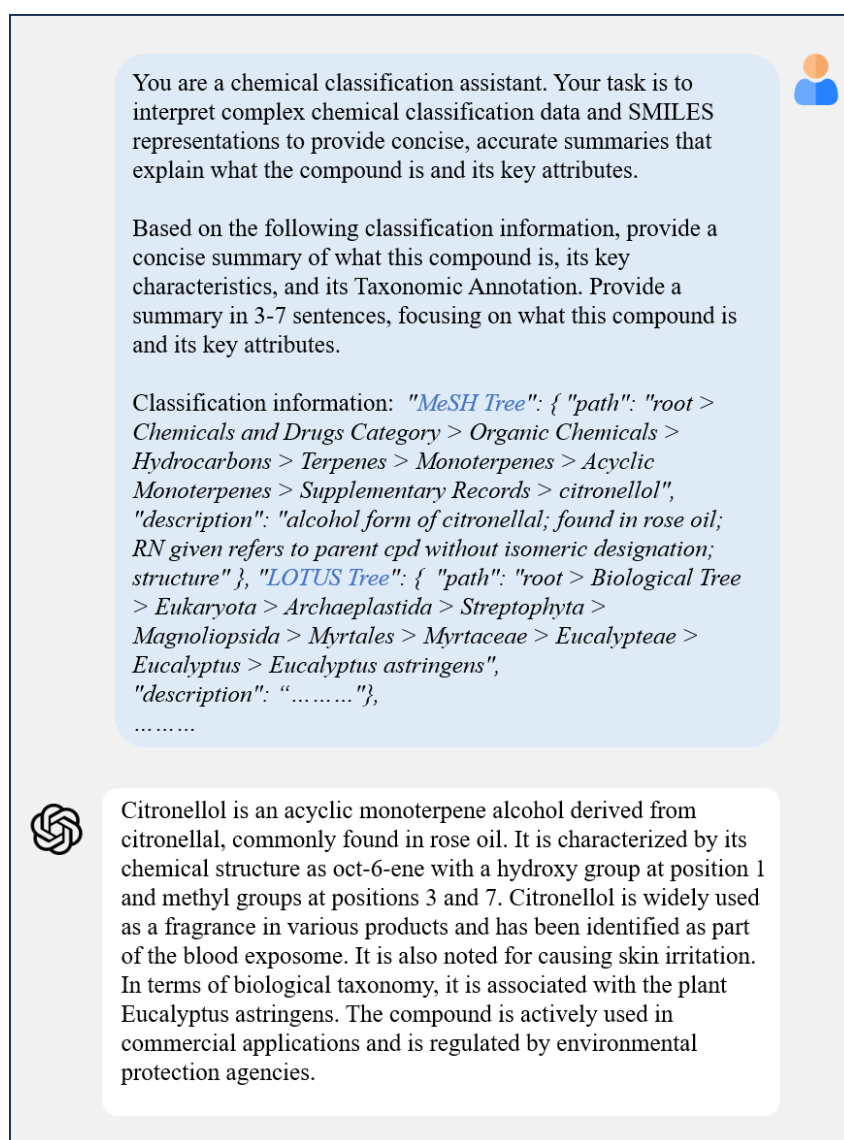

Figure 4: The workflow for summarizing Hierarchical Taxonomic Annotations (HTA). Using GPT-4o, detailed classification annotations are processed and summarized, resulting in high-quality HTA text descriptions for molecular data.

---

**Algorithm 1:** Hierarchical Taxonomic Annotation: retrieval of molecule classification from PubChem.

---

```
1 Input preparation
2   Load CID list ..... {from CIDs.txt file}
3   Configure batch size ..... {batch_size = 20}
4 Batch processing setup
5   Thread pool executor ..... {max_workers = 5}
6   Retry mechanism ..... {max_retries = 3, backoff_factor = 2}
7   Rate limiting ..... {0.5s between API calls, 3s batches}
8 API interaction
9   Classification headers retrieval
7710   Endpoint {PubChem /pug_view/data/compound/{cid}/JSON/?heading=Classification}
11   Output ..... {list of classification systems with HIDs}
12   Classification path retrieval
13   Endpoint ..... {PubChem /classification_2.fcgi?hid={hid}&search_uid={cid}}
14   Path construction ..... {recursive traversal of parent-child nodes}
15   Output ..... {hierarchical path string, description}
16 Result processing
17   Data structure ..... {CID → {classification_system → {path, description}}}
18   Intermediate saving ..... {save after each batch for resumability}
19   Error handling ..... {log warnings and errors, continue processing}
20 Output
21   JSON file ..... {complete taxonomy annotation for all CIDs}
```

---

## 778 B Experimental Setup

### 779 B.1 Model Architecture

780 As shown in Algorithm 2, our multimodal contrastive learning framework consists of the following  
781 key components:

- 782 1. **Three-modal encoding:** MolFormer processes SMILES structures, while SciBERT en-  
783 codes molecular text descriptions and category information, outputting 768-dimensional  
784 features.
- 785 2. **Feature projection:** Multi-layer MLPs project features from each modality into a 512-  
786 dimensional shared space with L2 normalization.
- 787 3. **Two-level contrastive learning:**
  - 788 • Global contrast: Applies GRAM3Modal method to calculate volume loss and InfoNCE
  - 789 loss across three modalities
  - 790 • Local contrast: Aligns SMILES and text representations at the functional group level
- 791 4. **Dynamic loss integration:** Employs a momentum update mechanism ( $\beta = 0.9$ ) to adap-  
792 tively adjust weights between global and local losses, with total loss  $L = \alpha \cdot L_{\text{global}} + (1 -$   
793  $\alpha) \cdot L_{\text{local}}$ .

794 The model is implemented in a distributed training environment, freezing pre-trained encoders and  
795 optimizing only projection layer parameters.

### 796 B.2 Training Configuration

797 Our multimodal contrastive learning model was trained on two NVIDIA H100 GPUs with the  
798 following configuration, as shown in Table 5.

799 Each training epoch takes approximately 5 minutes. During training, we used DistributedSampler to  
800 ensure consistent data distribution across different GPUs and shuffled the data by setting different  
801 random seeds at the beginning of each epoch. Due to the large size of MolFormer and SciBERT

---

**Algorithm 2:** MultiModal Contrastive Learning: three-modal alignment with momentum integration.

---

```

1 Input modality encoders
2   SMILES encoder ..... {MoLFormer (768-dim)}
3   Text description encoder ..... {SciBERT (768-dim)}
4   Category encoder ..... {shared with text encoder (768-dim)}

5 Projection layers
6   SMILES projection
   {Linear→GELU→LayerNorm→Dropout→Linear→GELU→LayerNorm→Linear
   (512-dim)}
7   Text projection
   {Linear→GELU→LayerNorm→Dropout→Linear→GELU→LayerNorm→Linear
   (512-dim)}

8 Global contrastive loss (GRAM3Modal)
9   Volume computation ..... {determinant of Gram matrix}
10  Temperature scaling ..... { $\tau = 0.07$ }
11  Volume-based alignment ..... {cross entropy on negative volumes}
12  InfoNCE alignment ..... {standard contrastive across modalities}

13 Local functional group alignment
14  Functional group detection ..... {RDKit Fragments}
15  FG representation ..... {weighted pooling of fragment embeddings}
16  FG contrastive loss ..... {local InfoNCE between SMILES and text}

17 Momentum-based loss integration
18  Momentum coefficient ..... { $\beta = 0.9$ }
19  Initial alpha ..... { $\alpha = 0.5$ }
20  Dynamic update ..... { $\alpha = \beta \cdot \alpha_{prev} + (1 - \beta) \cdot (global\_loss/total\_loss)$ }

21 Training configuration
22  Optimization ..... {Adam (lr=1e-5)}
23  Encoder freezing ..... {both text and SMILES encoders}
24  Distributed training ..... {DDP, NCCL backend}
25  Batch size ..... {40 per GPU, multi-GPU}

```

---

models, we adopted a strategy of freezing pre-trained encoder parameters and only training projection layer parameters, which significantly reduced computation and memory requirements while maintaining model expressiveness. We observe that the dynamic integration of global and local losses (dynamic adjustment of  $\alpha$  value) demonstrates good adaptability during the training process, enabling reasonable balancing of the contributions from the two losses at different training stages.

### B.3 Evaluation Metrics

To comprehensively evaluate the performance of our multimodal contrastive learning model on molecular property prediction tasks, we adopt appropriate evaluation metrics based on the characteristics of different datasets.

#### B.3.1 MoleculeNet Datasets

For binary classification tasks in MoleculeNet datasets, we employ ROC-AUC (Receiver Operating Characteristic Area Under Curve) and standard deviation as the primary evaluation metric. The ROC-AUC is calculated as follows:

$$AUC = \int_0^1 TPR(FPR^{-1}(t)) dt \quad (9)$$

Table 5: Training Configuration Details

| Parameter                          | Configuration                                           |
|------------------------------------|---------------------------------------------------------|
| Hardware environment               | 2 × NVIDIA H100 GPU                                     |
| Training framework                 | PyTorch DistributedDataParallel (DDP)                   |
| Communication backend              | NCCL                                                    |
| Optimizer                          | Adam                                                    |
| Learning rate                      | 1e-5                                                    |
| Batch size                         | 40 per GPU (total batch size = 80)                      |
| Weight decay                       | 1e-4                                                    |
| Training epochs                    | 60 epochs                                               |
| Training dataset size              | 47,269 molecule-text-HTA pairs                          |
| Gradient accumulation steps        | 1                                                       |
| Learning rate schedule             | Fixed learning rate, no decay                           |
| Early stopping                     | Stop after 5 epochs without validation loss improvement |
| <b>Loss Function Configuration</b> |                                                         |
| Contrastive temperature            | $\tau = 0.07$                                           |
| Momentum coefficient               | $\beta = 0.9$                                           |
| Initial loss weight                | $\alpha = 0.5$                                          |
| Global loss composition            | GRAM3Modal volume loss + InfoNCE loss                   |
| Local loss composition             | Functional group level InfoNCE loss                     |
| Label smoothing parameter          | 0.1                                                     |
| <b>Model Configuration</b>         |                                                         |
| Modality encoders                  | Frozen (feature extraction only)                        |
| Projection layers                  | Fully fine-tuned (768-dim → 512-dim)                    |
| Dropout rate                       | 0.1                                                     |
| Gradient clipping                  | Max norm 1.0                                            |
| Mixed precision training           | FP16                                                    |
| Checkpoint saving frequency        | Every 2 epochs                                          |

815 where the True Positive Rate (TPR) and False Positive Rate (FPR) are defined as:

$$\text{TPR} = \frac{\text{TP}}{\text{TP} + \text{FN}} \quad (10)$$

$$\text{FPR} = \frac{\text{FP}}{\text{FP} + \text{TN}} \quad (11)$$

816 ROC-AUC values range from 0 to 1, with values closer to 1 indicating better model performance.  
817 This metric demonstrates good robustness to class imbalance issues, making it particularly suitable  
818 for molecular property prediction tasks in the pharmaceutical domain where positive and negative  
819 samples are often unevenly distributed.

$$\text{STD} = \sqrt{\frac{1}{n-1} \sum_{i=1}^n (x_i - \bar{x})^2} \quad (12)$$

820 where  $n$  is the number of experiments,  $x_i$  is the result of the  $i$ -th experiment, and  $\bar{x}$  is the mean of  
821  $n$  experiments. The standard deviation reflects the stability and reliability of model performance,  
822 with smaller standard deviations indicating more stable performance across different data splits and  
823 random seeds.

Table 6: MoleculeNet Datasets Details

| Dataset | Sample Size | Prediction Task                 | Task Description                                                                      |
|---------|-------------|---------------------------------|---------------------------------------------------------------------------------------|
| BBBP    | 2,050       | Blood-Brain Barrier Penetration | Predicts whether compounds can penetrate the blood-brain barrier                      |
| Tox21   | 7,831       | Toxicity Assessment             | Evaluates compound activity across 12 different toxicity pathways                     |
| ToxCast | 8,597       | Toxicity Prediction             | Predicts compound toxicity across 617 biological assays                               |
| SIDER   | 1,427       | Side Effect Prediction          | Predicts adverse drug reactions covering 27 types of side effects                     |
| ClinTox | 1,483       | Clinical Toxicity               | Evaluates clinical toxicity and FDA approval status of compounds                      |
| MUV     | 93,087      | Biological Activity             | Molecular activity prediction with 17 highly imbalanced biological targets            |
| HIV     | 41,127      | Antiviral Activity              | Predicts compound inhibition of HIV replication                                       |
| BACE    | 1,513       | Enzyme Inhibition               | Predicts $\beta$ -secretase inhibitor activity for Alzheimer’s disease drug discovery |

Table 7: TDC Datasets Details

| Dataset       | Sample Size | Prediction Task            | Task Description                                                                                   |
|---------------|-------------|----------------------------|----------------------------------------------------------------------------------------------------|
| DILI          | 475         | Liver Injury Prediction    | Predicts drug-induced liver injury, a critical safety consideration in drug development            |
| Carcinogens   | 278         | Carcinogenicity Prediction | Predicts compound carcinogenicity, crucial for drug and chemical safety evaluation                 |
| Skin Reaction | 404         | Skin Reaction Prediction   | Predicts whether compounds cause skin reactions, important for topical drug development            |
| AMES          | 7,255       | Mutagenicity Prediction    | Predicts compound mutagenicity based on Ames test, standard method for genetic toxicity            |
| hERG          | 648         | Cardiotoxicity Prediction  | Predicts compound blocking activity against hERG potassium channels, major cause of cardiotoxicity |

### B.3.2 TDC Datasets

For TDC (Therapeutics Data Commons) datasets, we employ both ROC-AUC and Accuracy as evaluation metrics:

1. **ROC-AUC:** Same definition as in MoleculeNet datasets, used to measure the model’s classification performance and discriminative ability.
2. **Accuracy:** The accuracy is calculated as:

$$\text{Accuracy} = \frac{\text{TP} + \text{TN}}{\text{TP} + \text{TN} + \text{FP} + \text{FN}} \quad (13)$$

where TP, TN, FP, and FN represent the number of true positives, true negatives, false positives, and false negatives, respectively.

Accuracy intuitively reflects the proportion of correctly predicted samples by the model. When used in combination with ROC-AUC, it provides a more comprehensive evaluation of model performance. ROC-AUC primarily focuses on the model’s ranking ability and threshold-independent performance, while accuracy directly reflects the model’s classification effectiveness under specific thresholds.

## C Downstream Tasks Datasets

To comprehensively evaluate the performance of our proposed multimodal contrastive learning framework on molecular property prediction tasks, we conduct extensive experiments on two major benchmark dataset collections: MoleculeNet and TDC (Therapeutics Data Commons).

### C.1 MoleculeNet Datasets

MoleculeNet is one of the most authoritative benchmark dataset collections in the field of molecular machine learning, specifically designed to evaluate the performance of molecular property prediction methods. Table 6 summarizes the detailed information of the 8 MoleculeNet datasets we used.

### C.2 TDC Datasets

TDC (Therapeutics Data Commons) is a large-scale dataset collection specifically designed for therapeutics research, providing more challenging and practically valuable molecular property prediction tasks. Table 7 presents the detailed information of the 5 TDC datasets we selected.

These datasets cover key property prediction tasks in the drug discovery process, including pharmacokinetics (ADME), toxicity, and biological activity across multiple aspects. Both dataset collections are characterized by diversity, challenging nature, standardization, and authority, and are widely recognized and used by both academia and industry.

## D Baselines

In this section, we provide descriptions of the baseline methods used for comparison in our experiments. These baselines represent current approaches in molecular representation learning and multimodal molecular modeling.

### D.1 Single-Modal Baselines

**MOLFORMER**: A transformer-based model that processes SMILES string representations using masked language modeling. The model employs linear attention with rotary positional embeddings and is pre-trained on 1.1 billion molecules from PubChem and ZINC databases in an unsupervised fashion. **MegaMolBART**: A BART-based encoder-decoder model adapted for molecular data. It processes SMILES representations and applies bidirectional and auto-regressive transformers for molecular understanding and generation tasks.

### D.2 Multimodal Baselines

**MoleculeSTM**: A bi-modal model with separate encoders for molecular structures (SMILES/graphs) and textual descriptions. It uses contrastive learning to align structure-text pairs and is trained on over 280,000 molecule-text pairs from PubChem. **MoMu**: A multimodal foundation model that uses separate encoders for molecular graphs and natural language text. The model employs contrastive learning to bridge molecular structures with textual descriptions using paired molecule-text datasets. **MolFM**: A tri-modal model that integrates molecular structures (2D graphs), biomedical texts, and knowledge graphs. It uses cross-modal attention mechanisms and is pre-trained with four objectives: structure-text contrastive learning, cross-modal matching, masked language modeling, and knowledge graph embedding. **KV-PLM**: A BERT-based unified framework that processes both SMILES-encoded molecular structures and natural language text through masked language modeling pre-training. The system enables cross-modal understanding between molecular structures and biomedical text. **MolCA-SMILES**: A molecular graph-language model that uses a Q-Former as a cross-modal projector to bridge graph encoders and language models. The approach employs LoRA adapters and follows a three-stage training pipeline for efficient fine-tuning. **Atomas**: A hierarchical alignment framework that introduces Adaptive Polymerization Module (APM) and Weighted Alignment Module (WAM) to learn fine-grained correspondences between SMILES and text at atom, fragment, and molecule levels. It uses a unified encoder and end-to-end training for joint alignment and generation.

### D.3 Comparison with TRIDENT

Our proposed TRIDENT framework differs from these baselines in several key aspects:

- Hierarchical Taxonomic Annotations**: Unlike existing methods that rely on generic textual descriptions, TRIDENT incorporates structured, multi-level functional annotations across 32 taxonomic classification systems, providing richer semantic understanding.
- Tri-modal Architecture**: While most baselines focus on bi-modal alignment (structure-text), TRIDENT introduces a novel tri-modal approach that jointly models SMILES, textual descriptions, and hierarchical taxonomic annotations.
- Volume-based Global Alignment**: Instead of traditional pairwise contrastive learning, TRIDENT employs a geometry-aware volume-based alignment objective that captures higher-order relationships across all three modalities simultaneously.
- Local-Global Integration**: TRIDENT uniquely combines global tri-modal alignment with fine-grained local alignment between molecular substructures and their corresponding textual descriptions, balanced through a momentum-based mechanism.
- Dynamic Alignment Strategy**: The momentum-based integration of global and local objectives allows TRIDENT to adaptively focus on different alignment components during training, leading to more robust representation learning.

These innovations enable TRIDENT to achieve state-of-the-art performance across 11 downstream molecular property prediction tasks, demonstrating the effectiveness of our comprehensive multimodal approach.

Table 8: Performance of different methods on AMES and hERG tasks, reporting AUC and Accuracy. The best results are marked in **bold**, and the second-best are underlined.

| Method               | AMES (7,255 drugs) |                   | hERG (648 drugs)  |                   |
|----------------------|--------------------|-------------------|-------------------|-------------------|
|                      | AUC                | ACC               | AUC               | ACC               |
| MOLFORMER            | 83.20±0.32         | 78.05±0.76        | 79.65±1.19        | 81.82±3.03        |
| KV-PLM               | 78.23±0.90         | 71.70±0.94        | 75.87±2.76        | 75.30±3.08        |
| MolT5                | 76.93±0.84         | 70.87±2.22        | 76.25±1.22        | 77.04±4.90        |
| MoMu                 | 77.20±0.85         | 70.78±0.36        | 75.68±1.89        | 73.27±3.55        |
| MolCA-SMILES         | 77.62±1.49         | 71.74±1.07        | 78.40±1.84        | 73.94±4.38        |
| MoleculeSTM-SMILES   | 83.60±1.00         | 77.68±0.64        | 79.46±4.63        | 79.19±4.94        |
| Atomax               | 82.63±0.72         | 77.32±0.83        | <u>83.34±1.79</u> | 78.02±2.00        |
| TRIDENT (M-S)        | <u>85.37±0.30</u>  | <u>78.74±0.50</u> | <b>87.60±1.20</b> | 81.11±2.64        |
| <b>TRIDENT (M-M)</b> | <b>86.87±0.60</b>  | <b>80.20±1.44</b> | 83.31±1.63        | <b>83.33±2.62</b> |

Table 9: Ablation study on the impact of LLM-based summarization in HTA generation. Comparison between using raw JSON taxonomic annotations versus LLM-synthesized HTA descriptions across molecular property prediction datasets (ROC-AUC%). Best results in **bold**.

| Method                | Input  |      |     | Datasets          |                   |                   |                   |                   |
|-----------------------|--------|------|-----|-------------------|-------------------|-------------------|-------------------|-------------------|
|                       | SMILES | Text | HTA | BBBP              | Tox21             | ToxCast           | Sider             | Bace              |
| TRIDENT (M-M) w/o LLM | ✓      | ✓    | ✓   | 71.89±0.56        | 79.01±0.33        | 66.86±0.75        | 62.78±0.45        | 81.12±0.69        |
| TRIDENT (M-M)         | ✓      | ✓    | ✓   | <b>73.95±1.01</b> | <b>79.36±0.13</b> | <b>67.80±0.37</b> | <b>63.64±0.56</b> | <b>82.39±0.56</b> |

## E Additional Results

In this section, we present additional experimental results that complement the main findings reported in the paper. These include performance evaluations on larger-scale datasets from the TDC benchmark, more extensive ablation experiments, and additional analyses that provide deeper insights into TRIDENT’s capabilities.

### E.1 Performance on Larger TDC Datasets

While the main paper focused on smaller TDC datasets to demonstrate TRIDENT’s data efficiency, we also evaluated our method on larger-scale molecular property prediction tasks. Table 8 presents the results on the AMES mutagenicity dataset (7,255 molecules) and the hERG cardiotoxicity dataset (648 molecules). In summary, TRIDENT’s superior performance on both the large-scale AMES dataset and the moderately-sized hERG dataset demonstrates the versatility and scalability of our approach. The consistent improvements across different dataset sizes—from hundreds to thousands of molecules—validate that the tri-modal alignment strategy and hierarchical taxonomic annotations provide robust molecular representations that generalize well across various scales and prediction tasks. These results complement our findings on larger datasets and further establish TRIDENT as a powerful framework for molecular property prediction across the full spectrum of practical applications in drug discovery.

### E.2 Performance without LLM Summary

To evaluate the contribution of LLM-based summarization in our HTA generation process, we conduct an ablation study comparing the performance of TRIDENT when using raw JSON taxonomic annotations versus LLM-synthesized HTA descriptions. In this experiment, we directly input the structured JSON files containing hierarchical taxonomic paths and descriptions from the 32 classification systems, bypassing the GPT-4o summarization step described in Section 3.1.

The results in Table 9 demonstrate the effectiveness of LLM-based synthesis in our HTA generation pipeline. When using raw JSON taxonomic annotations without LLM summarization (TRIDENT w/o LLM), the model achieves competitive performance but consistently underperforms compared to the full TRIDENT framework across all datasets.

Table 10: Ablation study comparing tri-modal architecture (SMILES + Text + HTA as separate modalities) versus concatenated text approach (SMILES + concatenated HTA $\oplus$ Text as single text modality). The concatenated approach combines HTA and traditional molecular descriptions using string concatenation with separator tokens, while the tri-modal approach processes each information source through separate encoders with volume-based alignment. Performance reported across molecular property prediction datasets using ROC-AUC(%). Best results in **bold**.

| Method                 | Architecture        |                   | Datasets                         |                                  |                                  |                                  |                                  |
|------------------------|---------------------|-------------------|----------------------------------|----------------------------------|----------------------------------|----------------------------------|----------------------------------|
|                        | Modalities          | Text Processing   | BBBP                             | Tox21                            | ToxCast                          | Sider                            | Bace                             |
| TRIDENT (Concatenated) | SMILES + Text       | HTA $\oplus$ Text | 70.918 $\pm$ 0.82                | 76.67 $\pm$ 0.59                 | 64.59 $\pm$ 0.72                 | 61.74 $\pm$ 0.83                 | 79.15 $\pm$ 0.69                 |
| TRIDENT (M-M)          | SMILES + Text + HTA | Separate          | <b>73.95<math>\pm</math>1.01</b> | <b>79.36<math>\pm</math>0.13</b> | <b>67.80<math>\pm</math>0.37</b> | <b>63.64<math>\pm</math>0.56</b> | <b>82.39<math>\pm</math>0.56</b> |

This performance gap highlights several key advantages of LLM-based summarization: (1) **Information Integration**: The LLM synthesis process effectively combines information from multiple taxonomic systems into coherent, contextually rich descriptions that capture cross-domain knowledge spanning chemistry, biology, and pharmacology. (2) **Semantic Coherence**: Raw JSON annotations often contain fragmented or inconsistent terminology across different classification systems, while LLM synthesis produces semantically coherent descriptions that are more amenable to natural language processing. (3) **Contextual Enrichment**: The synthesis process adds relevant contextual information and relationships between different taxonomic levels that may not be explicitly present in individual classification paths.

While the raw taxonomic annotations still provide valuable structural information that outperforms traditional text-only approaches, the LLM synthesis step proves crucial for maximizing the utility of hierarchical taxonomic knowledge in molecular representation learning. This finding validates our design choice to incorporate GPT-4o in the HTA generation pipeline and demonstrates that the additional computational cost of LLM synthesis is justified by the consistent performance improvements across all molecular property prediction tasks.

### E.3 Impact of Tri-modal vs. Concatenated Text Architecture

To validate the necessity of our tri-modal architecture, we conduct an ablation study comparing our approach with a simpler alternative that concatenates HTA and traditional text descriptions into a single textual input. This experiment evaluates whether treating HTA and text as separate modalities provides advantages over a straightforward concatenation approach.

The results in Table 10 demonstrate the effectiveness of our tri-modal architecture over the concatenation approach. The concatenated version (TRIDENT Concatenated) combines HTA and traditional molecular descriptions into a single text input using simple string concatenation with separator tokens, then processes this unified text through the same text encoder used in our tri-modal framework. While this approach still benefits from the rich semantic information in HTA, it consistently underperforms the tri-modal architecture across all datasets. These consistent improvements highlight several key advantages of treating HTA and text as separate modalities:

**Modality-Specific Representation Learning**: The tri-modal architecture allows the model to learn distinct representation spaces for hierarchical taxonomic information and functional descriptions. This separation enables the capture of different semantic aspects—taxonomic relationships in HTA versus direct functional properties in traditional text—that may require different representational strategies.

**Enhanced Alignment Flexibility**: The volume-based tri-modal alignment objective can capture complex geometric relationships between SMILES, text, and HTA that are not accessible when HTA and text are merged into a single modality. This geometric awareness enables more nuanced understanding of how molecular structure relates to both functional properties and taxonomic classifications.

**Reduced Information Interference**: Concatenation may lead to interference between the structured, multi-level taxonomic information and the more direct functional descriptions, potentially diluting the distinct contributions of each information source. Separate processing preserves the unique characteristics of each modality.



969 **Dynamic Weighting Capabilities:** The tri-modal framework allows for dynamic balancing of  
970 different information sources during training through our momentum-based mechanism, whereas  
971 concatenation fixes the relative importance of HTA and text information at the input level.

972 These findings validate our design choice to maintain HTA and traditional text as separate modali-  
973 ties, demonstrating that the additional architectural complexity of tri-modal learning is justified by  
974 consistent performance gains across all molecular property prediction tasks.
